# Supplementary material for: Disparities in breast cancer screening, stage at diagnosis, and treatment in Brazil: A warning of the need to change public policies
Source: Research Square preprint supplement (doi:10.21203/rs.3.rs-7762480/v1), 2025-11-11
Supplement: Supplementary file 1 [file 0b094ae457644a7eb0ba1b64.docx]

**Supporting information**

**S1 Table.** Trends in breast cancer screening coverage within the Brazilian Public Healthcare System, for Brazil as a whole and for each region and state, in women of 40-49 years of age between 2013 and 2022.

| **Regions/States** | **Period** | **APC** | **95%CI** | **Interpretation** | **Period** | **APC** | **95%CI** | **Interpretation** |
| --- | --- | --- | --- | --- | --- | --- | --- | --- |
| **Brazil** | 2013-2020 | -10.79 * | -19.17 to -7.80 | Reduction | 2020-2022 | 13.54 | -7.76 to 29.78 | Stability |
| **North** | 2013-2020 | -9.56 * | -23.02 to -4.25 | Reduction | 2020-2022 | 13.82 | -8.45 to 31.64 | Stability |
| Acre | 2013-2022 | 3.25 | -11.17 to 21.94 | Stability | - | - | - | - |
| Amazonas | 2013-2022 | -14.57 * | -20.32 to -10.41 | Reduction | - | - | - | - |
| Rondônia | 2013-2022 | -3.25 | -13.01 to 6.66 | Stability | - | - | - | - |
| Amapá | 2013-2016 | -40.92 | -82.15 to 4.97 | Stability | 2016-2022 | 56.65 * | 31.62 to 198.62 | Increase |
| Pará | 2013-2022 | -3.74 | -8.32 to 0.51 | Stability | - | - | - | - |
| Roraima | 2013-2020 | -6.75 | -2.77 to 29.50 | Stability | 2020-2022 | 61.75 * | 12.86 to 120.66 | Increase |
| Tocantins | 2013-2022 | -17.83 * | -29.72 to 10.00 | Reduction | - | - | - | - |
| **Northeast** | 2013-2020 | -9.91 * | -17.20 to -7.34 | Reduction | 2020-2022 | 15.93 | -4.73 to 31.32 | Stability |
| Alagoas | 2013-2022 | -5.34 * | -8.23 to -2.62 | Reduction | - | - | - | - |
| Bahia | 2013-2020 | -9.54 * | -16.97 to -6.60 | Reduction | 2020-2022 | 23.69 | -0.33 to 44.25 | Stability |
| Ceará | 2013-2022 | -7.34 | -15.97 to 0.02 | Stability | - | - | - | - |
| Maranhão | 2013-2020 | -4.22 | -23.94 to 3.68 | Stability | 2020-2022 | 32.76 * | 1.55 to 64.47 | Increase |
| Paraíba | 2013-2022 | -8.93 * | -14.73 to -4.16 | Reduction | - | - | - | - |
| Pernambuco | 2013-2022 | -13.45 * | -18.25 to -10.11 | Reduction | - | - | - | - |
| Piauí | 2013-2022 | -5.23 * | -9.89 to -0.86 | Reduction | - | - | - | - |
| Rio Grande do Norte | 2013-2022 | -2.16 | -5.58 to 1.30 | Stability | - | - | - | - |
| Sergipe | 2013-2022 | -1.13 | -5.13 to 3.05 | Stability | - | - | - | - |
| **Southeast** | 2013-2020 | -10.72 * | -18.49 to -6.82 | Reduction | 2020-2022 | 9.81 | -8.56 to 23.93 | Stability |
| Espírito Santo | 2013-2022 | -7.15 * | -11.23 to -3.61 | Reduction | - | - | - | - |
| Minas Gerais | 2013-2020 | -19.99 * | -24.68 to -18.11 | Reduction | 2020-2022 | 25.03 | -4.60 to 46.08 | Stability |
| Rio de Janeiro | 2013-2022 | -8.35 * | -12.35 to -5.23 | Reduction | - | - | - | - |
| São Paulo | 2013-2022 | -5.19 * | -8.65 to -2.35 | Reduction | - | - | - | - |
| **South** | 2013-2022 | -7.06 * | -10.00 to -4.65 | Reduction | - | - | - | - |
| Paraná | 2013-2022 | -5.93 * | -9.50 to -2.90 | Reduction | - | - | - | - |
| Rio Grande do Sul | 2013-2022 | -5.62 * | -8.12 to -3.39 | Reduction | - | - | - | - |
| Santa Catarina | 2013-2020 | -13.42 * | -25.43 to -6.76 | Reduction | 2020-2022 | 10.88 | -13.96 to 34.28 | Stability |
| **Midwest** | 2013-2020 | -8.51 * | -16.84 to -5.45 | Reduction | 2020-2022 | 18.81 | -1.86 to 37.63 | Stability |
| Federal District | 2013-2017 | -46.97 * | -71.11 to -34.45 | Reduction | 2017-2022 | 15.45 | -9.80 a 136.58 | Stability |
| Goiás | 2013-2022 | -3.9057 | -7.96 to 0.03 | Stability | - | - | - | - |
| Mato Grosso | 2013-2020 | -11.71 * | -32.26 to -3.19 | Reduction | 2020-2022 | 30.81 | -8.40 to 70.27 | Stability |
| Mato Grosso do Sul | 2013-2022 | -0.07 | -5.86 to 5.85 | Stability | - | - | - | - |

* Statistically significant, p <0.05; APC: Annual percent change; 95%CI: 95% confidence interval.

**S2 Table.** Trends in breast cancer screening coverage within the Brazilian Public Healthcare System, for Brazil as a whole and for each region and state, in women of 50-69 years of age between 2013 and 2022.

| **Regions/States** | **Period** | **APC** | **95%CI** | **Interpretation** | **Period** | **APC** | **95%CI** | **Interpretation** |
| --- | --- | --- | --- | --- | --- | --- | --- | --- |
| **Brazil** | 2013-2022 | -4.61 | -9.23-0.23 | Stability | - | - | - | - |
| **North** | 2013-2020 | -6.24 | -22.96 to 16.11 | Stability | 2020-2022 | 10.22 | -12.08 to 30.22 | Stability |
| Acre | 2013-2022 | 1.67 | -10.50 to 16.85 | Stability | - | - | - | - |
| Amazonas | 2013-2017 | -32.94 | -75.64 to 0.30 | Stability | 2017-2022 | 68.57 * | 37.29 to 192.34 | Increase |
| Rondônia | 2013-2022 | -10.33 * | -15.51 to -6.06 | Reduction | - | - | - | - |
| Amapá | 2013-2022 | -0.29 | -4.84 to 4.63 | Stability | - | - | - | - |
| Pará | 2013-2022 | -1.56 | -10.20 to 7.67 | Stability | - | - | - | - |
| Roraima | 2013-2022 | 8.29 * | 0.66 to 20.18 | Increase | - | - | - | - |
| Tocantins | 2013-2022 | -16.34 * | -30.19 to -6.48 | Reduction | - | - | - | - |
| **Northeast** | 2013-2022 | -3.96 | -8.05 to 0.02 | Stability | - | - | - | - |
| Alagoas | 2013-2022 | 1.05 | -2.08 to 4.65 | Stability | - | - | - | - |
| Bahia | 2013-2022 | -5.01 * | -9.67 to -0.71 | Reduction | - | - | - | - |
| Ceará | 2013-2016 | 13.11 | -3.63 to 62.32 | Stability | 2016-2022 | -10.45 * | -32.70 to -4.16 | Reduction |
| Maranhão | 2013-2020 | -1.35 | -17.08 to 4.44 | Stability | 2020-2022 | 32.97 * | 6.85 to 60.11 | Increase |
| Paraíba | 2013-2022 | -7.03 * | -12.09 to -2.65 | Reduction | - | - | - | - |
| Pernambuco | 2013-2022 | -6.39 * | -10.68 to -2.64 | Reduction | - | - | - | - |
| Piauí | 2013-2017 | 12.68 * | 2.37 to 62.95 | Increase | 2017-2022 | -10.49 * | -34.69 to -4.12 | Reduction |
| Rio Grande do Norte | 2013-2022 | -0.73 | -4.25 to 3.02 | Stability | - | - | - | - |
| Sergipe | 2013-2022 | 0.32 | -4.70 to 5.94 | Stability | - | - | - | - |
| **Southeast** | 2013-2022 | -3.63 * | -7.01 to -0.48 | Reduction | - | - | - | - |
| Espírito Santo | 2013-2022 | -2.95 | -7.55 to 1.54 | Stability | - | - | - | - |
| Minas Gerais | 2013-2022 | -7.64 * | -11.10 to -4.90 | Reduction | - | - | - | - |
| Rio de Janeiro | 2013-2022 | -4.01 | -8.19 to 0.01 | Stability | - | - | - | - |
| São Paulo | 2013-2022 | -1.57 | -4.65 to 1.40 | Stability | - | - | - | - |
| **South** | 2013-2022 | -3.56 * | -7.01 to -0.25 | Reduction | - | - | - | - |
| Paraná | 2013-2022 | -2.61 | -6.93 to 1.57 | Stability | - | - | - | - |
| Rio Grande do Sul | 2013-2022 | -2.52 | -5.24 to 0.18 | Stability | - | - | - | - |
| Santa Catarina | 2013-2022 | -7.02 * | -10.74 to -3.83 | Reduction | - | - | - | - |
| **Midwest** | 2013-2020 | -6.08 * | -17.51 to -2.46 | Reduction | 2020-2022 | 22.34 * | 0.87 to 43.90 | Increase |
| Federal District | 2017 | -34.96 * | -72.40 to -15.16 | Reduction | 2017-2022 | 13.55 | -16.23 to 157.15 | Stability |
| Goiás | 2013-2022 | -0.39 | -4.86 to 4.54 | Stability | - | - | - | - |
| Mato Grosso | 2013-2020 | -6.60 | -28.14 to 4.10 | Stability | 2020-2022 | 29.95 | -2.56 to 65.41 | Stability |
| Mato Grosso do Sul | 2013-2022 | -0.25 | -4.93 to 4.75 | Stability | - | - | - | - |

* Statistically significant: p <0.05; APC: Annual percent change; 95%CI: 95% confidence interval.

**S3 Table.** Trends in breast cancer screening coverage within the Brazilian Public Healthcare System, for Brazil as a whole and for each region and state, in women of 70 years of age or older, between 2013 and 2022.

| **Regions/States** | **Period** | **APC** | **95%CI** | **Interpretation** | **Period** | **APC** | **95%CI** | **Interpretation** |
| --- | --- | --- | --- | --- | --- | --- | --- | --- |
| **Brazil** | 2013-2022 | -6.27 * | -10.13 to 2.69 | Reduction | - | - | - | - |
| **North** | 2013-2022 | -7.39 * | -10.90 to -4.19 | Reduction | - | - | - | - |
| Acre | 2013-2022 | -5.08 | -16.31 to 6.69 | Stability | - | - | - | - |
| Amazonas | 2013-2020 | -32.12 * | -47.40 to -26.45 | Reduction | 2020-2022 | 359.09 * | 159.72 to 701.65 | Increase |
| Rondônia | 2013-2022 | -12.78 * | -21.27 to -5.50 | Reduction | - | - | - | - |
| Amapá | 2013-2016 | 16.30 * | 2.97 to 40.63 | Increase | 2016-2022 | -7.36 * | -22.93 to -2.51 | Reduction |
| Pará | 2013-2022 | -5.57 | -13.36 to 1.85 | Stability | - | - | - | - |
| Roraima | 2013-2017 | 18.94 * | 0.37 to 137.41 | Increase | 2017-2022- | -15.68 * | -61.22 to -4.07 | Reduction |
| Tocantins | 2013-2022 | -19.02 * | -30.94 to -10.15 | Reduction | - | - | - | - |
| **Northeast** | 2013-2022 | -7.97 * | -12.11 to -4.21 | Reduction | - | - | - | - |
| Alagoas | 2013-2022 | -1.23 | -6.73 to 4.39 | Stability | - | - | - | - |
| Bahia | 2013-2022 | -10.04 * | -16.05 to -5.01 | Reduction | - | - | - | - |
| Ceará | 2013-2017 | 2.89 | -4.59 to 25.38 | Stability | 2017-2022 | -15.08 * | -41.41 to -9.06 | Reduction |
| Maranhão | 2013-2020 | -6.68 | -28.19 to 4.98 | Stability | 2020-2022 | 41.79 | -2.54 to 87.78 | Stability |
| Paraíba | 2013-2022 | -6.54 * | -11.17 to -2.32 | Reduction | - | - | - | - |
| Pernambuco | 2013-2022 | -11.99 * | -16.67 to -7.98 | Reduction | - | - | - | - |
| Piauí | 2013-2017 | 2.96 | -5.54 to 31.87 | Stability | 2017-2022 | -17.43 * | -48.37 to -10.65 | Reduction |
| Rio Grande do Norte | 2013-2022 | -2.97 | -7.55 to 1.60 | Stability | - | - | - | - |
| Sergipe | 2013-2022 | -3.75 | -9.34 to 1.58 | Stability | - | - | - | - |
| **Southeast** | 2013-2022 | -4.73 * | -9.06 to -0.69 | Reduction | - | - | - | - |
| Espírito Santo | 2013-2022 | -7.63 * | -12.09 to -3.82 | Reduction | - | - | - | - |
| Minas Gerais | 2013-2020 | -16.69 * | -25.56 to -12.49 | Reduction | 2020-2022 | 70.1531* | 14.29 to 111.13 | Increase |
| Rio de Janeiro | 2013-2022 | -6.06 * | -9.93 to -2.64 | Reduction | - | - | - | - |
| São Paulo | 2013-2018 | 1.85 | -2.03 to 12.35 | Stability | 2018-2022 | -13.4115* | -33.09 to -6.83 | Reduction |
| **South** | 2013-2022 | -5.28 * | -9.80 to -0.97 | Reduction | - | - | - | - |
| Paraná | 2013-2022 | -4.41 | -11.29 to 2.19 | Stability | - | - | - | - |
| Rio Grande do Sul | 2013-2019 | -1.28 | -5.19 to 13.84 | Stability | 2019-2022 | -15.5373* | -41.96 to -4.87 | Reduction |
| Santa Catarina | 2013-2020 | -11.83 | -29.08 to 4.49 | Stability | 2020-2022 | 28.75 | -14.42 to 69.51 | Stability |
| **Midwest** | 2013-2020 | -9.21 * | -21.66 to -5.22 | Reduction | 2020-2022 | 23.58 | -0.31 to 47.36 | Stability |
| Federal District | 2013-2018 | -35.76 * | -67.00 to -25.12 | Reduction | 2018-2022 | 47.44 | -4.61 to 318.78 | Stability |
| Goiás | 2013-2022 | -4.60 | -9.38 to 0.11 | Stability | - | - | - | - |
| Mato Grosso | 2013-2022 | -8.75 * | -14.98 to -3.16 | Reduction | - | - | - | - |
| Mato Grosso do Sul | 2013-2022 | -8.31 * | -13.44 to -3.73 | Reduction | - | - | - | - |

* Statistically significant: p <0.05; APC: Annual percent change; 95%CI: 95% confidence interval.

**S4 Table.** Trends in the proportion of late-stage diagnosis within the Brazilian Public Healthcare System, for Brazil, its geographical regions and states, for women of 40-49 years of age, between 2013 and 2022.

| **Regions/States** | **Period** | **APC** | **95%CI** | **Interpretation** | **Period** | **APC** | **95%CI** | **Interpretation** |
| --- | --- | --- | --- | --- | --- | --- | --- | --- |
| **Brazil** | 2013-2022 | 1.71 * | 1.31-2.10 | Increase | - | - | - | - |
| **North** | 2013-2022 | 1.27 * | 0.05 to 2.88 | Increase | - | - | - | - |
| Rondônia | 2013-2022 | 8.22 * | 4.56 to 13.70 | Increase | - | - | - | - |
| Acre | 2013-2022 | 4.86 | -2.62 to 18.20 | Stability | - | - | - | - |
| Amazonas | 2013-2019 | 2.06 * | 0.20 to 7.33 | Increase | 2019-2022 | -7.93* | -17.07 to -3.69 | Reduction |
| Pará | 2013-2016 | 7.88 * | 2.80 to 19.70 | Increase | 2016-2022 | -0.45 | -5.67 to 1.38 | Stability |
| Roraima | 2013-2018 | -5.51 | -45.21 to 10.56 | Stability | 2018-2022 | 27.47 * | 12.18 to 70.97 | Increase |
| Tocantins | 2013-2015 | 24.83 * | 12.23 to 38.78 | Increase | 2015-2022 | -1.73* | -2.81 to -0.57 | Reduction |
| **Northeast** | 2013-2022 | 1.42 * | 0.83 to 2.06 | Increase | - | - | - | - |
| Alagoas | 2013-2022 | 0.76 | -0.72 to 2.24 | Stability | - | - | - | - |
| Bahia | 2013-2022 | 0.90 | -0.11 to 2.22 | Stability | - | - | - | - |
| Ceará | 2013-2022 | 3.58 * | 2.50 to 4.94 | Increase | - | - | - | - |
| Maranhão | 2013-2019 | -1.03 | -8.85 to 4.32 | Stability | 2019-2022 | 3.84 | -0.60 to 9.92 | Stability |
| Paraíba | 2013-2022 | 0.24 | -0.80 to 1.45 | Stability | - | - | - | - |
| Pernambuco | 2013-2017 | 6.00 * | 1.48 to 15.76 | Increase | 2017-2022 | -3.17* | -11.62 to -0.06 | Reduction |
| Piauí | 2013-2019 | -3.66* | -11.08 to -0.62 | Reduction | 2019-2022 | 17.59 * | 8.93 to 34.82 | Increase |
| Rio Grande do Norte | 2013-2020 | 1.26 | -0.02 to 6.33 | Stability | 2020-2022 | -9.91 * | -16.94 to -1.81 | Reduction |
| Sergipe | 2013-2019 | 7.21* | 4.61 to 31.65 | Increase | 2019-2022 | -6.07 * | -18.29 to -0.32 | Reduction |
| **Southeast** | 2013-2022 | 1.72 * | 1.41 to 2.05 | Increase | - | - | - | - |
| Espírito Santo | 2013-2015 | -10.59 * | -17.52 to -1.75 | Reduction | 2015-2022 | 2.19 * | 0.24 to 7.41 | Increase |
| Minas Gerais | 2013-2022 | 2.04 * | 0.97 to 3.16 | Increase | - | - | - | - |
| Rio de Janeiro | 2013-2015 | 6.06 * | 2.67 to 8.87 | Increase | 2015-2022 | -2.65 * | -3.58 to -2.10 | Reduction |
| São Paulo | 2013-2019 | 1.97 | -0.23 to 2.68 | Stability | 2019-2022 | 4.56* | 3.52 to 6.56 | Increase |
| **South** | 2013-2022 | 1.25 * | 0.84 to 1.73 | Increase | - | - | - | - |
| Paraná | 2013-2022 | 1.95 * | 0.27 to 3.67 | Increase | - | - | - | - |
| Rio Grande do Sul | 2013-2015 | 6.33 | -2.80 to 18.25 | Stability | 2015-2022 | -1.56 | -11.98 to 4.06 | Stability |
| Santa Catarina | 2013-2022 | 1.69 | -0.24 to 3.24 | Stability | - | - | - | - |
| **Midwest** | 2013-2022 | 2.99 * | 1.89 to 4.48 | Increase | - | - | - | - |
| Federal District | 2013-2022 | 5.57 * | 4.12 to 8.25 | Increase | - | - | - | - |
| Goiás | 2013-2022 | 4.22 * | 2.61 to 8.88 | Increase | - | - | - | - |
| Mato Grosso | 2013-2019 | 3.02 * | 0.78 to 12.47 | Increase | 2019-2022 | -4.83 * | -12.39 to -0.31 | Reduction |
| Mato Grosso do Sul | 2013-2022 | 1.57 | -0.45 to 4.56 | Stability | - | - | - | - |

No data were generated for Amapá by the Join Point Regression analysis. * Statistically significant: p <0.05; APC: Annual percent change; 95%CI: 95% confidence interval.

**S5 Table.** Trends in the proportion of late-stage diagnosis within the Brazilian Public Healthcare System, for Brazil, its geographical regions and states, for women of 50-69 years of age, between 2013 and 2022.

| **Regions/States** | **Period** | **APC** | **95%CI** | **Interpretation** | **Period** | **APC** | **95%CI** | **Interpretation** |
| --- | --- | --- | --- | --- | --- | --- | --- | --- |
| **Brazil** | 2013-2022 | 1.43 * | 0.95 to 1.95 | Increase | - | - | - | - |
| **North** | 2013-2022 | 1.44 | -0.19 to 3.37 | Stability | - | - | - | - |
| Rondônia | 2013-2022 | 7.99 * | 5.53 to 13.69 | Increase | - | - | - | - |
| Acre | 2013-2015 | 30.54 * | 14.96 to 50.12 | Increase | 2015-2022 | -3.24 * | -5.59 to -1.31 | Reduction |
| Amazonas | 2013-2022 | 0.88 | -0.47 to 2.46 | Stability |  |  |  |  |
| Pará | 2013-2018 | -2.05 | -17.83 to 4.24 | Stability | 2018-2022 | 19.37 * | 14.85 to 28.92 | Increase |
| Roraima | 2013-2016 | -11.91 | -36.16 to 9.41 | Stability | 2016-2022 | 13.13 * | 4.61 to 45.38 | Increase |
| Tocantins | 2013-2022 | 2.19 | -2.51 to 10.92 | Stability | - | - | - | - |
| **Northeast** | 2013-2022 | 0.90 * | 0.12 to 1.69 | Increase | - | - | - | - |
| Alagoas | 2013-2022 | -0.50 | -2.51 to 1.57 | Stability | - | - | - | - |
| Bahia | 2013-2018 | -0.76 | -7.41 to 2.22 | Stability | 2018-2022 | 3.96 * | 0.77 to 10.91 | Increase |
| Ceará | 2013-2022 | 2.56 * | 1.15 to 4.70 | Increase | - | - | - | - |
| Maranhão | 2013-2022 | -0.92 * | -1.36 to -0.45 | Reduction | - | - | - | - |
| Paraíba | 2013-2019 | -2.89 | -15.74 to 17.59 | Stability | 2019-2022 | 2.89 | -8.49 to 14.20 | Stability |
| Pernambuco | 2013-2018 | 3.66 * | 1.47 to 12.55 | Increase | 2018-2022 | -3.23 * | -12.55 to -0.35 | Reduction |
| Piauí | 2013-2016 | -6.25 | -15.10 to 3.47 | Stability | 2016-2022 | 6.50 * | 3.62 to 17.06 | Increase |
| Rio Grande do Norte | 2013-2022 | -0.59 | -2.87 to 2.95 | Stability |  |  |  |  |
| Sergipe | 2013-2017 | 13.51 * | 1.64 to 87.79 | Increase | 2017-2022 | -5.84 * | -28.90 to -1.23 | Reduction |
| **Southeast** | 2013-2022 | 1.54 * | 0.90 to 2.18 | Increase | - | - | - | - |
| Espírito Santo | 2013-2022 | -0.12 | -3.55 to 3.33 | Stability | - | - | - | - |
| Minas Gerais | 2013-2022 | 2.37 * | 1.76 to 3.01 | Increase | - | - | - | - |
| Rio de Janeiro | 2013-2015 | 6.33 | -0.23 to 14.08 | Stability | 2015-2022 | -2.04 * | -6.69 to -1.07 | Reduction |
| São Paulo | 2013-2019 | 1.23 | -2.62 to 2.50 | Stability | 2019-2022 | 5.78 * | 3.03 to 11.00 | Increase |
| **South** | 2013-2017 | 1.10 | -4.40 to 1.00 | Stability | 2017-2022 | 1.82 * | 0.80 to 5.41 | Increase |
| Paraná | 2013-2022 | 2.08 * | 0.30 to 4.16 | Increase | - | - | - | - |
| Rio Grande do Sul | 2013-2022 | -1.37 | -2.87 to 0.02 | Stability | - | - | - | - |
| Santa Catarina | 2013-2022 | 1.51 * | 0.54 to 2.69 | Increase | - | - | - | - |
| **Midwest** | 2013-2022 | 1.54 * | 0.90 to 2.18 | Increase | - | - | - | - |
| Federal District | 2013-2015 | 14.21 * | 5.87 to 22.43 | Increase | 2015-2022 | 3.87 * | 1.24 to 5.59 | Increase |
| Goiás | 2013-2022 | 6.70 * | 4.59 to 10.62 | Increase | - | - | - | - |
| Mato Grosso | 2013-2015 | 9.03 | -3.88 to 26.28 | Stability | 2015-2022 | -2.0086 | -17.16 to 4.43 | Stability |
| Mato Grosso do Sul | 2013-2017 | -6.46 * | -17.07 to -0.72 | Reduction | 2017-2022 | 6.94 * | 2.60 to 22.86 | Increase |

No data were generated for Amapá by the Join Point Regression analysis. * Statistically significant: p <0.05; APC: Annual percent change; 95%CI: 95% confidence interval.

**S6 Table.** Trends in the proportion of late-stage diagnosis within the Brazilian Public Healthcare System, for Brazil, its geographical regions and states, for women of 70 years of age or older, between 2013 and 2022.

| **Regions/States** | **Period** | **APC** | **95%CI** | **Interpretation** | **Period** | **APC** | **95%CI** | **Interpretation** |
| --- | --- | --- | --- | --- | --- | --- | --- | --- |
| **Brazil** | 2013-2022 | 1.82 * | (0.79-3.06) | Increase | - | - | - | - |
| **North** | 2013-2022 | 1.04 | (-2.30 to 5.21) | Stability | - | - | - | - |
| Acre | 2013-2017 | -18.51 * | -41.57 to -5.21 | Reduction | - | - | - | - |
| Amazonas | 2013-2016 | 57.88 * | 13.32 to 394.86 | Increase | - | - | - | - |
| Rondônia | 2013-2022 | 8.75 * | 3.37 to 19.09 | Increase | 2017-2022 | 12.37 | -0.64 to 56.33 | Stability |
| Pará | 2013-2022 | 0.97 | -2.37 to 5.79 | Stability | - | - | - | - |
| Tocantins | 2013-2022 | 7.24 | -0.58 to 19.27 | Stability | 2016-2022 | 0.23 | -23.71 to 8.65 | Stability |
| **Northeast** | 2013-2022 | 1.17 * | (0.29 to 2.24) | Increase | - | - | - | - |
| Alagoas | 2013-2022 | 1.40 | -4.16 to 8.84 | Stability | - | - | - | - |
| Bahia | 2013-2022 | 1.40 | -0.63 to 3.80 | Stability | - | - | - | - |
| Ceará | 2013-2022 | 2.27 * | 1.50 to 3.16 | Increase | - | - | - | - |
| Maranhão | 2013-2022 | -0.43 | -4.85 to 4.64 | Stability | - | - | - | - |
| Paraíba | 2013-2022 | -1.43 | -3.86 to 1.17 | Stability | - | - | - | - |
| Pernambuco | 2013-2022 | 0.06 | -2.97 to 3.19 | Stability | - | - | - | - |
| Piauí | 2013-2022 | 4.06 * | 0.51 to 10.40 | Increase | - | - | - | - |
| Rio Grande do Norte | 2013-2022 | -2.42 | -6.78 to 3.46 | Stability | - | - | - | - |
| **Southeast** | 2013-2022 | 1.96 * | (1.04 to 2.97) | Increase | - | - | - | - |
| Espírito Santo | 2013-2022 | 2.71 | -2.78 to 11.12 | Stability | - | - | - | - |
| Minas Gerais | 2013-2022 | 3.17 * | 1.37 to 5.22 | Increase | - | - | - | - |
| Rio de Janeiro | 2013-2015 | 8.03 | -0.37 to 15.48 | Stability | 2015-2022 | -3.14 * | -6.74 to -1.96 | Reduction |
| São Paulo | 2013-2022 | 2.89 * | 1.57 to 4.55 | Increase | - | - | - | - |
| **South** | 2013-2022 | 1.21 * | (0.14 to 2.34) | Increase | - | - | - | - |
| Paraná | 2013-2020 | 5.03 * | 3.36 to 13.60 | Increase | 2020-2022 | -5.70 | -11.79 to 1.91 | Stability |
| Rio Grande do Sul | 2013-2020 | -1.76 | -9.27 to 5.54 | Stability | 2020-2022 | 7.47 | -0.70 to 15.50 | Stability |
| Santa Catarina | 2013-2015 | 12.37 * | 1.46 to 26.76 | Increase | 2015-2022 | 0.01 | -7.10 to 2.62 | Stability |
| **Midwest** | 2013-2022 | 5.25 * | (1.26 to 11.67) | Increase | - | - | - | - |
| Federal District | 2013-2022 | 3.97 * | 0.51 to 12.28 | Increase | - | - | - | - |
| Goiás | 2013-2022 | 8.87* | 4.23 to 20.40 | Increase | - | - | - | - |
| Mato Grosso | 2013-2020 | 5.45 * | 0.35 to 61.95 | Increase | 2020-2022 | -26.27 * | -49.48 to -3.14 | Reduction |
| Mato Grosso do Sul | 2013-2022 | 5.04 * | 1.73 to 12.29 | Increase | - | - | - | - |

No data were generated for Roraima, Amapá or Sergipe by the Join Point Regression analysis. * Statistically significant: p <0.05; APC: Annual percent change; 95%CI: 95% confidence interval.

**S7 Table.** Trends regarding cases in which the time interval from diagnosis to treatment initiation exceeds 60 days in women of 40-49 years of age within the Brazilian Public Healthcare System, for Brazil as a whole, its geographical regions and states, between 2013 and 2022.

| **Regions/States** | **Period** | **APC** | **95%CI** | **Interpretation** | **Period** | **APC** | **95%CI** | **Interpretation** |
| --- | --- | --- | --- | --- | --- | --- | --- | --- |
| **Brazil** | 2013-2022 | 0.69 | -0.49-1.80 | Stability | - | - | - | - |
| **North** | 2013-2019 | -1.97 | -8.54 to 0.42 | Stability | 2019-2022 | 6.59 * | 1.21 to 17.68 | Increase |
| Acre | 2013-2022 | 2.62 | -3.97 to 12.12 | Stability | - | - | - | - |
| Amapá | 2013-2016 | -16.51 | -43.23 to 6.71 | Stability | 2016-2022 | 18.78 * | 14.15 to 44.66 | Increase |
| Amazonas | 2013-2022 | 3.49 * | 0.54 to 7.43 | Increase | - | - | - | - |
| Pará | 2013-2022 | 0.50 | -4.35 to 4.98 | Stability | - | - | - | - |
| Rondônia | 2013-2022 | -5.29 * | -9.52 to -2.27 | Reduction | - | - | - | - |
| Roraima | 2013-2022 | 4.65 | -0.36 to 14.63 | Stability | - | - | - | - |
| Tocantins | 2013-2022 | 3.90 | -0.77 to 11.96 | Stability | - | - | - | - |
| **Northeast** | 2013-2022 | 1.74 * | 0.25 to 3.23 | Increase | - | - | - | - |
| Alagoas | 2013-2022 | 6.47 * | 3.84 to 10.02 | Increase | - | - | - | - |
| Bahia | 2013-2022 | 0.84 | -0.57 to 2.55 | Stability | - | - | - | - |
| Ceará | 2013-2022 | 1.72 | -0.48 to 2.55 | Stability | - | - | - | - |
| Maranhão | 2013-2022 | -0.22 | -3.75 to 3.09 | Stability | - | - | - | - |
| Paraíba | 2013-2020 | 1.19 | -4.12 to 5.71 | Stability | 2020-2022 | 10.60 * | 2.25 to 16.19 | Increase |
| Pernambuco | 2013-2022 | 1.58 | -0.19 to 3.54 | Stability | - | - | - | - |
| Piauí | 2013-2020 | 0.37 | -13.98 to 4.60 | Stability | 2020-2022 | 28.43 * | 7.24 to 44.82 | Increase |
| Rio Grande do Norte | 2013-2022 | 2.68 | -0.54 to 6.04 | Stability | - | - | - | - |
| Sergipe | 2013-2022 | -0.83 | -5.37 to 5.41 | Stability | - | - | - | - |
| **Southeast** | 2013-2022 | -0.17 | -0.82 to 0.51 | Stability | - | - | - | - |
| Espírito Santo | 2013-2022 | -3.57 * | -7.01 to -0.14 | Reduction | - | - | - | - |
| Minas Gerais | 2013-2022 | -0.69 | -1.71 to 0.21 | Stability | - | - | - | - |
| Rio de Janeiro | 2013-2022 | -0.62 | -2.33 to 0.77 | Stability | - | - | - | - |
| São Paulo | 2013-2022 | 0.80 | -0.05 to 1.82 | Stability | - | - | - | - |
| **South** | 2013-2022 | 0.52 | -0.71 to 1.80 | Stability | - | - | - | - |
| Paraná | 2013-2022 | -1.11 | -2.97 to 0.81 | Stability | - | - | - | - |
| Rio Grande do Sul | 2013-2022 | 2.03 | -0.80 to 5.24 | Stability | - | - | - | - |
| Santa Catarina | 2013-2022 | 0.61 | -0.63 to 2.17 | Stability | - | - | - | - |
| **Midwest** | 2013-2018 | 0.17 | -9.88 to 7.45 | Stability | 2018-2022 | 6.32 * | 1.13 to 16.00 | Increase |
| Federal District | 2013-2022 | 2.10 | -0.93 to 5.59 | Stability | - | - | - | - |
| Goiás | 2013-2018 | -3.86 | -17.90 to 0.65 | Stability | 2018-2022 | 12.8771* | 7.62 to 26.09 | Increase |
| Mato Grosso | 2013-2019 | 0.49 | -12.40 to 7.87 | Stability | 2019-2022 | 7.8631 | -1.66 to 15.87 | Stability |
| Mato Grosso do Sul | 2013-2017 | 12.89 * | 6.80 to 31.12 | Increase | 2017-2022 | -4.2467* | -11.15 to -1.53 | Reduction |

* Statistically significant: p <0.05; APC: Annual percent change; 95%CI: 95% confidence interval.

**S8 Table.** Trends regarding cases in which the time interval from diagnosis to treatment initiation exceeds 60 days in women of 50-69 years of age within the Brazilian Public Healthcare System, for Brazil as a whole, its geographical regions and states, between 2013 and 2022.

| **Regions/States** | **Period** | **APC** | **95%CI** | **Interpretation** | **Period** | **APC** | **95%CI** | **Interpretation** |
| --- | --- | --- | --- | --- | --- | --- | --- | --- |
| **Brazil** | 2013-2022 | 1.27 * | 0.33-2.01 | Increase | - | - | - | - |
| **North** | 2013-2019 | -0.48 | -5.12 to 5.10 | Stability | 2019-2022 | 3.7337 | -1.00 to 9.19 | Stability |
| Acre | 2013-2022 | 2.77 | -2.23 to 10.49 | Stability | - | - | - | - |
| Amapá | 2013-2016 | -20.43 * | -45.56 to -0.75 | Reduction | 2016-2022 | 12.65 * | 5.92 to 46.72 | Increase |
| Amazonas | 2013-2022 | 4.96 * | 4.02 to 6.33 | Increase | - | - | - | - |
| Pará | 2013-2018 | -2.54 | -8.29 to 0.34 | Stability | 2018-2022 | 5.21 * | 1.15 to 13.66 | Increase |
| Rondônia | 2013-2022 | -2.38 | -7.52 to 1.89 | Stability | - | - | - | - |
| Roraima | 2013 | -1.84 | -8.07 to 4.22 | Stability | - | - | - | - |
| Tocantins | 2013-2022 | 1.70 | -2.75 to 8.86 | Stability | - | - | - | - |
| **Northeast** | 2013-2022 | 2.59 * | 1.46 to 3.64 | Increase | - | - | - | - |
| Alagoas | 2013-2022 | 5.59 * | 2.66 to 9.39 | Increase | - | - | - | - |
| Bahia | 2013-2022 | 0.58 | -0.60 to 1.81 | Stability | - | - | - | - |
| Ceará | 2013-2020 | 2.14 | -2.31 to 3.75 | Stability | 2020-2022 | 8.03 * | 3.37 to 11.60 | Increase |
| Maranhão | 2013-2022 | 2.52 * | 0.34 to 5.24 | Increase | - | - | - | - |
| Paraíba | 2013-2019 | -0.42 | -13.60 to 12.83 | Stability | 2019-2022 | 8.59 * | 1.59 to 21.40 | Increase |
| Pernambuco | 2013-2017 | 6.66 * | 3.40 to 15.82 | Increase | 2017-2022 | 1.23 | -5.96 to 3.75 | Stability |
| Piauí | 2013-2018 | -2.84 | -16.51 to 4.04 | Stability | 2018-2022 | 10.50 * | 2.74 to 29.79 | Increase |
| Rio Grande do Norte | 2013-2022 | 5.03 * | 2.11 to 9.44 | Increase | - | - | - | - |
| Sergipe | 2013-2015 | 42.58 * | 5.49 to 123.56 | Increase | 2015-2022 | -3.69 * | -14.06 to -0.09 | Reduction |
| **Southeast** | 2013-2022 | 0.44 | -0.23 to 1.03 | Stability | - | - | - | - |
| Espírito Santo | 2013-2022 | 0.48 | -3.34 to 4.41 | Stability | - | - | - | - |
| Minas Gerais | 2013-2022 | -0.21 | -0.93 to 0.62 | Stability | - | - | - | - |
| Rio de Janeiro | 2013-2022 | -0.34 | -1.88 to 1.22 | Stability | - | - | - | - |
| São Paulo | 2013-2022 | 1.32 * | 0.28 to 2.13 | Increase | - | - | - | - |
| **South** | 2013-2022 | 1.84 * | 0.71 to 2.88 | Increase | - | - | - | - |
| Paraná | 2013-2022 | 0.16 | -1.70 to 2.27 | Stability | - | - | - | - |
| Rio Grande do Sul | 2013-2022 | 2.93 * | 1.89 to 4.14 | Increase | - | - | - | - |
| Santa Catarina | 2013-2022 | 1.64 * | 0.39 to 2.91 | Increase | - | - | - | - |
| **Midwest** | 2013-2022 | 2.98 * | 1.69 to 4.60 | Increase | - | - | - | - |
| Federal District | 2013-2022 | 1.84 * | 0.08 to 3.74 | Increase | - | - | - | - |
| Goiás | 2013-2017 | -4.49 * | -9.81 to -0.62 | Reduction | 2017-2022 | 8.53 * | 6.42 to 14.43 | Increase |
| Mato Grosso | 2013-2022 | 1.75 | -0.30 to 4.13 | Stability | - | - | - | - |
| Mato Grosso do Sul | 2013-2017 | 12.39 * | 6.55 to 28.19 | Increase | 2017-2022 | -1.78 | -7.42 to 0.91 | Stability |

* Statistically significant: p <0.05; APC: Annual percent change; 95%CI: 95% confidence interval.

**S9 Table.** Trends regarding cases in which the time interval from diagnosis to treatment initiation exceeds 60 days in women of 70 years of age or older within the Brazilian Public Healthcare System, for Brazil as a whole, its geographical regions and states, between 2013 and 2022.

| **Regions/States** | **Period** | **APC** | **95%CI** | **Interpretation** | **Period** | **APC** | **95%CI** | **Interpretation** |
| --- | --- | --- | --- | --- | --- | --- | --- | --- |
| **Brazil** | 2013-2022 | 1.83 * | 1.51-2.36 | Increase | - | - | - | - |
| **North** | 2013-2019 | -2.33 | -12.40 to 6.44 | Stability | 2019-2022 | 4.95 | -2.04 to 13.9 | Stability |
| Amazonas | 2013-2022 | 3.65 | -0.30 to 10.98 | Stability | - | - | - | - |
| Rondônia | 2013-2022 | 2.24 | -6.92 to 14.08 | Stability | - | - | - | - |
| Maranhão | 2013-2022 | 0.01 | -2.56 to 3.53 | Stability | - | - | - | - |
| Pará | 2013-2022 | -0.28 | -2.79 to 3.03 | Stability | - | - | - | - |
| Tocantins | 2013-2017 | 17.69 * | 5.84 to 77.77 | Increase | 2017-2022 | -9.14 * | -28.48 to -2.84 | Reduction |
| **Northeast** | 2013-2022 | 2.18 * | 0.68 to 3.72 | Increase | - | - | - | - |
| Alagoas | 2013-2022 | 6.48 * | 4.50 to 11.14 | Increase | - | - | - | - |
| Bahia | 2013-2022 | -0.38 | -3.34 to 2.65 | Stability | - | - | - | - |
| Ceará | 2013-2022 | 3.35 * | 1.14 to 6.18 | Increase | - | - | - | - |
| Paraíba | 2013-2022 | 1.50 | -1.14 to 5.15 | Stability | - | - | - | - |
| Pernambuco | 2013-2019 | 7.91 * | 4.96 to 27.23 | Increase | 2019-2022 | -3.81 | -20.42 to 3.21 | Stability |
| Piauí | 2013-2020 | -4.67 | -20.96 to 0.69 | Stability | 2020-2022 | 23.91 * | 3.62 to 42.63 | Increase |
| Rio Grande do Norte | 2013-2022 | 2.49 | -3.10 to 10.72 | Stability | - | - | - | - |
| Sergipe | 2013-2022 | 7.92 * | 5.17 to 13.41 | Increase | - | - | - | - |
| **Southeast** | 2013-2022 | 0.85 | -0.02 to 1.65 | Stability | - | - | - | - |
| Espírito Santo | 2013-2022 | 1.57 | -1.79 to 6.00 | Stability | - | - | - | - |
| Minas Gerais | 2013-2022 | 0.76 | -0.44 to 2.16 | Stability | - | - | - | - |
| Rio de Janeiro | 2013 | -1.87 | -6.56 to 0.25 | Stability | 2020-2022 | 5.32 | -1.35 to 11.88 | Stability |
| São Paulo | 2013-2022 | 1.52 * | 0.54 to 2.52 | Increase | - | - | - | - |
| **South** | 2013­-2022 | 2.57 * | 1.83 to 3.36 | Increase | - | - | - | - |
| Paraná | 2013-2022 | 2.48 * | 0.88 to 4.46 | Increase | - | - | - | - |
| Rio Grande do Sul | 2013-2022 | 3.77 * | 2.57 to 5.09 | Increase | - | - | - | - |
| Santa Catarina | 2013-2022 | 0.709 | -0.81 to 2.30 | Stability | - | - | - | - |
| **Midwest** | 2013-2022 | 2.99 * | 1.32 to 5.01 | Increase | - | - | - | - |
| Federal District | 2013-2022 | 2.03 | -0.55 to 5.16 | Stability | - | - | - | - |
| Goiás | 2013-2022 | 3.71 * | 1.28 to 6.86 | Increase | - | - | - | - |
| Mato Grosso | 2013-2022 | 2.01 | -2.97 to 7.11 | Stability | - | - | - | - |
| Mato Grosso do Sul | 2013-2015 | 18.78 | -1.70 to 42.94 | Stability | 2015-2022 | 0.29 | -12.29 to 11.65 | Stability |

No data were generated for Acre, Roraima or Amapá by the Join Point Regression analysis. * Statistically significant: p <0.05; APC: Annual percent change; 95%CI: 95% confidence interval.
